# Supplementary material for: Enhancement in intramolecular interactions and in vitro biological activity of a tripodal tetradentate system upon complexation
Source: Royal Society of Chemistry journal article supplement (doi:10.1039/c5dt00450k), 2015-01-01
Supplement: c5dt00450k1.pdf [file c5dt00450k1.pdf]

## Supplementary Supporting Information

### Enhancement in intramolecular interactions and *in vitro* biological activity of a tripodal tetradentate system upon complexation

Nidhi Tyagi,<sup>a</sup> Mambattakkara Viji,<sup>a</sup> Suneesh C. Karunakaran,<sup>a</sup> Sunil Varughese,<sup>a</sup> Shilpa Ganesan,<sup>b</sup> Sulochana Priya,<sup>b</sup> P. S. Saneesh Babu,<sup>c</sup> Asha S. Nair,<sup>c</sup> and Danaboyina Ramaiah<sup>a,d\*</sup>

<sup>a</sup>Photosciences and Photonics, Chemical Sciences and Technology Division, <sup>b</sup>Agroprocessing and Natural Products, CSIR-National Institute for Interdisciplinary Science and Technology (CSIR-NIIST), Thiruvananthapuram 695019, India. <sup>c</sup>Cancer Research Program, Rajiv Gandhi Centre for Biotechnology, Thiruvananthapuram - 695014, Kerala, India. <sup>d</sup>CSIR-North East Institute of Science and Technology (CSIR-NEIST), Jorhat - 785006, Assam, India.

\*To whom correspondence should be addressed at: Tel +91 376 2370012; Fax +91 376 2370011; E-mail: [rama@rrljorhat.res.in](mailto:rama@rrljorhat.res.in) and [d.ramaiah@gmail.com](mailto:d.ramaiah@gmail.com)

| S.No. |                                                                                                                                                                             | Page |
|-------|-----------------------------------------------------------------------------------------------------------------------------------------------------------------------------|------|
| 1     | Experimental section                                                                                                                                                        | 2-7  |
| 2     | Fig. S1 shows NMR and MALDI-TOF spectra of <b>Bz-NI</b> and complexes respectively                                                                                          | 8-9  |
| 3     | Fig. S2 shows cyclic voltammograms of complexes <b>1</b> and <b>2</b>                                                                                                       | 10   |
| 4     | Fig. S3 shows EPR spectra of complex <b>2</b>                                                                                                                               | 10   |
| 5     | Fig. S4 shows ORTEP plot and face-to-face stacking of the ligand ( <b>Bz-NI</b> )                                                                                           | 11   |
| 6     | Fig. S5 shows TG analysis of the ligand ( <b>Bz-NI</b> ) and the complex <b>2</b> .                                                                                         | 11   |
| 7     | Fig. S6 shows intermolecular $\pi$ - $\pi$ stacking interactions in <b>Bz-NI</b>                                                                                            | 12   |
| 8     | Fig. S7 shows different stacking modes of naphthalimide moieties in complex <b>2</b>                                                                                        | 13   |
| 9     | Fig. S8 shows the plot of $[\text{DNA}]/(\epsilon_a - \epsilon_f)$ vs $[\text{DNA}]$ and $I_0/I$ vs $[Q]$ of complexes <b>1</b> and <b>2</b> .                              | 13   |
| 10    | Fig. S9 shows fluorescence emission spectra and double log plot of <b>2</b> with CT-DNA                                                                                     | 14   |
| 11    | Fig. S10 shows CD spectra of complexes <b>1</b> and <b>2</b> in absence and presence of DNA                                                                                 | 14   |
| 12    | Fig. S11 shows Stern–Volmer and double-log plots of complexes <b>1</b> and <b>2</b> with BSA at 27 °C and 37 °C                                                             | 15   |
| 13    | Fig. S12 shows thermodynamic parameters of the interaction of BSA with complexes <b>1-2</b>                                                                                 | 15   |
| 14    | Fig. S13 shows <i>in vitro</i> cytotoxicity assay with different concentrations of ligand and metal salts, sigmoid curves fitted to the complexes <b>1</b> and <b>2</b> and | 16   |

|    |                                                                                                                                                  |    |
|----|--------------------------------------------------------------------------------------------------------------------------------------------------|----|
|    | <i>In vitro</i> cytotoxicity assay against the <i>H9C2</i> cell line                                                                             |    |
| 15 | Fig. S14 shows phase contrast image of control <i>HeLa</i> and <i>H9C2</i> cells treated with complexes <b>1</b> and <b>2</b> .                  | 17 |
| 16 | Fig. S15 shows bright-field images of control ( <i>HeLa</i> ) cells treated with complexes <b>1</b> and <b>2</b> by DAPI staining.               | 17 |
| 17 | Fig. S16 shows flow cytometric analysis of <i>HeLa</i> cells treated with different concentrations of complex <b>1</b> for 24 h.                 | 18 |
| 18 | Table S1 shows cyclic voltammetric measurements for complexes <b>1</b> and <b>2</b>                                                              | 19 |
| 19 | Table S2 shows crystal data and structure refinement details for <b>Bz-Ni</b> ·3H <sub>2</sub> O and complex <b>2</b> ·2DMF· 4H <sub>2</sub> O   | 19 |
| 20 | Table S3 shows selected bond lengths (Å) and bond angles (deg) for <b>Bz-Ni</b> ·3H <sub>2</sub> O and complex <b>2</b> ·2DMF· 4H <sub>2</sub> O | 20 |
| 21 | Table S4 shows binding and relative thermodynamic parameters of BSA                                                                              | 20 |
| 22 | Table S5 shows experimentally and computed ligand log P values                                                                                   | 20 |

## 1. Experimental Section

### 1.1. Materials and Methods

The melting points were determined on a Mel-Temp II melting point apparatus. <sup>1</sup>H and <sup>13</sup>C NMR were recorded on a 500 MHz Bruker advanced DPX spectrometer. IR spectra were recorded on a Perkin Elmer Model 882 infrared spectrometer with KBr disks in the range 4000–400 cm<sup>-1</sup>. MALDI-TOF MS analysis was performed with a Shimadzu Biotech Axima CFR plus instrument equipped with a nitrogen laser in the linear mode. The electronic absorption spectra and fluorescence spectra were recorded on a Shimadzu UV-VIS-NIR scanning spectrophotometer and SPEX-Fluorolog F112X spectrofluorimeter. Quantum yields of fluorescence were measured by equation 1 using optically dilute solutions (quinine sulphate solution is used as standard). Fluorescence lifetimes were measured using IBH picoseconds time correlated single photon counting system. The fluorescence decay profiles were deconvoluted using IBH data station software V2.1 and minimizing the  $\chi^2$  values of the fit to  $1 \pm 0.1$ . Magnetic susceptibilities were determined at 296 K with Vibrating Sample Magnetometer model 155, using nickel as a standard. Solution state magnetic moment were determined at room temperature using the Evans method. Diamagnetic corrections were carried out with Pascal's increments.<sup>1</sup> Molar conductivities were determined in DMF at 10<sup>-3</sup> M at 25 °C with a Systronics 304 conductometer. Cyclic voltammetry measurements were carried out using a CV-50W electroanalyzer in DMF using platinum wire as auxiliary electrode, glassy-carbon as working electrode. The potentials were referenced to the standard Ag/AgCl electrode and ferrocene (0.53 V, E<sub>1/2</sub>) was used as an internal standard.

All the solvents were dried prior to use. Anhydrous  $\text{FeCl}_3$  and  $\text{Cu}(\text{ClO}_4)_2 \cdot 6\text{H}_2\text{O}$  were purchased from Aldrich and S. D. Fine Chemicals, India and used without further purification. Tris(2-benzimidazolylmethyl)amine, (m.p. 277–281 °C) and 2-(3-bromopropyl)-benzo[de]isoquinoline-1,3-dione (m.p. 138–140 °C) was prepared by reported procedures.<sup>2</sup> Calf thymus DNA (CT-DNA), BSA, ethidium bromide (EB) and oligonucleotides (**DNA1**; 5' CAC TGG CTT TTC GGT GCAT, **DNA2**: 5' ATG CAC CGA AAA GCC AGTG were purchased from Sigma.

## 1.2. X-ray Crystallography

Single crystals of **Bz-NI**·3H<sub>2</sub>O and **2**·2DMF·4H<sub>2</sub>O were obtained from a CH<sub>2</sub>Cl<sub>2</sub>–CH<sub>3</sub>OH mixture and DMF, respectively. The data sets for the single-crystal X-ray studies for **Bz-NI**·3H<sub>2</sub>O and **2**·2DMF·4H<sub>2</sub>O were collected with Mo K $\alpha$  ( $\lambda = 0.71073$  Å) radiation on a RIGAKU diffractometer. All the calculations were performed using SHELXTL.

## 1.3. DNA Binding Experiments

The DNA binding experiments were performed in 10 mM phosphate buffer (pH 7.4) (2 mM NaCl) using DMF-buffer (15%) solution. A solution of calf thymus DNA (CT-DNA) was sonicated for 2 h and filtered through a 0.45  $\mu\text{M}$  millipore filter. The concentration of CT-DNA was determined from the absorption intensity at 260 nm with  $\epsilon$  value of 6600  $\text{M}^{-1}\text{cm}^{-1}$ .<sup>3</sup> Absorption titration experiments were made using different concentration of CT-DNA, while keeping the complex concentration constant. Samples were equilibrated at room temperature for 5 min before recording each spectrum. Fluorescence emission spectra of the DNA–EB system were determined with DNA pre-treated with ethidium bromide (EB) at a ratio of  $[\text{DNA}]/[\text{EB}] = 2$  for 30 min in 15% DMF-H<sub>2</sub>O. Subsequently, varying concentrations of **1** and **2** (0–10  $\mu\text{M}$ ) were gradually dispensed into the cuvette, incubated for 5 min at room temperature. The fluorescence emission spectra of the samples were recorded from 530 to 800 nm by using  $\lambda_{\text{ex}}$  at 510 nm. DNA melting experiments were carried out by monitoring the absorption intensity of oligonucleotides (**DNA1**: 5' CGT GCA TGC ACG GTAC-3', **DNA2**: 5' GTA CCG TGC AAT GTC CACG-3') (2  $\mu\text{M}$ ) at 260 nm at various temperatures, both in the absence and presence of **1** and **2** (2–5  $\mu\text{M}$ ).  $\Delta T_m$  values were calculated by determining the midpoints of melting curves from the first-order derivatives. Viscometric titrations were performed using LAUDA DLK10 automated viscometer, thermostatted at 25 °C in a constant temperature bath. The concentration of CT DNA was 100  $\mu\text{M}$ , and the flow times were measured with an automated timer. Each sample was measured 3 times and an average flow

time was calculated. Data were presented as  $(\eta/\eta_0)^{1/3}$  versus [complex]/[DNA], ( $\eta$ ,  $\eta_0$ : Specific viscosities of DNA in presence and absence of complexes respectively).<sup>4</sup>

#### **1.4. Protein Binding Studies**

Spectrofluorimetric titrations of **1** and **2** (0-16  $\mu$ M) in DMF-buffer (15%) solution at pH 7.4 ( $\lambda_{\text{ex}}$  = 345 nm) was also performed with increasing concentration of BSA. Quenching of the fluorescence emission of tryptophan residues of BSA was done using **1** and **2** as quenchers. To solutions of BSA in phosphate buffer at pH 7.4, increments of quenchers were added and the emission signals at ~344 nm ( $\lambda_{\text{ex}}$  at 280 nm) were recorded after each addition of the quenchers at the corresponding temperature (27 °C and 37 °C). Conformational changes were studied using synchronous fluorescence measurements. Synchronous fluorescence spectral studies were performed at  $\Delta\lambda$  = 15 nm and 60 nm using similar concentration of BSA.

#### **1.5. Cytotoxicity Studies Using MTT Assay**

MTT assay was done to measure the effect of ligand and metal complexes on the growth inhibition of human cervical cancer (HeLa) cells and H9c2 cell lines.<sup>5</sup> Cells were treated with different concentrations of ligand and complexes for 24 h and the percentage of growth inhibition was calculated as follows,

$$\% \text{ of growth inhibition} = [1 - \text{absorbance of treated cells} / \text{absorbance of untreated cells}] \times 100$$

#### **1.6. Morphological analysis.**

The morphological alterations in confluent monolayers of HeLa cells treated with or without metal complexes for 24 h and observed the transmitted light images to see the morphological alterations. (Magnification-40X)

#### **1.7. Acridine Orange/Ethidium Bromide (AO/EB) Staining.**

HeLa cells were treated with or without metal complexes for 24 h were washed with PBS and trypsinised. 25  $\mu$ l of cell suspension ( $1 \times 10^4$  cells/mL) were incubated with 1  $\mu$ l of acridine orange/ethidium bromide (one part each of 100  $\mu$ g /mL of acridine orange and 100  $\mu$ g/mL of ethidium bromide in PBS) just prior to microscopy.<sup>6</sup> A 10  $\mu$ l of gently mixed suspension was placed on a microscope slide covered with glass slips and examined under fluorescent microscope (BD) connected to a digital imaging system.

### 1.8. DAPI staining.

DAPI staining<sup>7</sup> was done to study the nuclear fragmentation.  $1 \times 10^4$ /mL HeLa cells in the exponential growing phase were treated with 20  $\mu$ M and 50  $\mu$ M concentrations of both iron and copper complexes for 24 h. After treatment, cells were stained with DAPI (10  $\mu$ g/ml) for 10 min, washed with PBS twice and images were taken using a Live Cells Imager (BD pathway TM Bioimage System, BD Biosciences).

### 1.9. Flow Cytometric Annexin V Apoptotic Studies.

Approximately  $10^6$  HeLa cells were seeded on 100 mm dishes and incubated for 24 h at 37 °C under 5% CO<sub>2</sub>. Cells were incubated with 5 and 10  $\mu$ M of complex **2** as well as with 15 and 30  $\mu$ M of complex **1** for 24 h. In this experiment, 0.1% DMSO were taken as control. Cells were stained with FITC-labeled Annexin using Annexin V–FITC apoptosis detection kit (Sigma Aldrich) according to the manufacturer's instruction, and a flow cytometric analysis was then carried out using FACS Aria (BD, USA).

### 1.10. Immunoblot Analysis.

Approximately  $10^6$  HeLa cells were seeded on 100 mm dishes and incubated for 24 h at 37 °C under 5% CO<sub>2</sub>. Cells were incubated with 5 and 10  $\mu$ M of complex **2** as well as with 15 and 30  $\mu$ M of complex **1** for 24 h. In this experiment 0.1% DMSO were taken as control. Cells were then lysed, and the total protein content was measured using Bradford's reagent. Then 75 mg of total protein was loaded for SDS–PAGE, and immunoblotting was carried out using PARP antibody (cell signaling), and horseradish peroxidase-conjugated secondary antibodies (Santa Cruz) were used, followed by detection using enhanced chemiluminescence (ECL) method.

### 1.11. Lipophilicity

To quantify the lipophilicity of the ligand and complexes, water-octanol partition coefficients (P) were measured using the shake-flask method.<sup>9</sup> The log P values of the free ligands were also calculated using the online program ALOGSP 2.1 available at the Virtual Computational Chemistry Laboratory.<sup>9</sup> The resulting and calculated log P values are reported in Table S5.

### 1.12. Equations Employed

The quantum yields of fluorescence were calculated using (quinine sulphate ( $\Phi_f = 0.54$ ) in 0.1 N H<sub>2</sub>SO<sub>4</sub> as standard) the equation 1,

$$\phi_u = \frac{A_s F_u n_u^2}{A_u F_s n_s^2} \phi_s \quad (1)$$

wherein,  $A_s$  and  $A_u$  are the absorbance of standard and unknown, respectively.  $F_s$  and  $F_u$  are the areas of fluorescence peaks of the standard and unknown and  $n_s$  and  $n_u$  are the refractive indices of the solvents used for the standard and unknown, respectively.  $\Phi_s$  and  $\Phi_u$  are the fluorescence quantum yields of the standard and unknown compound.

The intrinsic binding constants ( $K_{DNA}$ ) were calculated by using equation 2,<sup>8</sup>

$$[DNA]/(\epsilon_a - \epsilon_f) = [DNA]/(\epsilon_b - \epsilon_f) + 1/K_{DNA}(\epsilon_b - \epsilon_f) \quad \dots\dots\dots(2)$$

wherein,  $[DNA]$  is the concentration of CT-DNA in base pairs. The apparent absorption coefficient  $\epsilon_a$  was obtained by calculating  $A_{obsd}/[complex]$ . The terms  $\epsilon_f$  and  $\epsilon_b$  correspond to the extinction coefficient of free (unbound) and fully bound complexes, respectively. A plot of  $[DNA]/(\epsilon_a - \epsilon_f)$  vs  $[DNA]$  gives  $K_{DNA}$  as the ratio of slope  $[1/(\epsilon_b - \epsilon_f)]$  to intercept  $[1/K_{DNA}(\epsilon_b - \epsilon_f)]$ .

When a small molecules bind to a DNA or protein to a set of equivalent sites, the number of sites  $n$  can be obtained from the following equation,<sup>10</sup>

$$\log \frac{(I_0 - I)}{I} = \log K_b + n \log [Q] \quad \dots\dots\dots(3)$$

wherein,  $K_b = K_{b,DNA}$  and  $K_{b,BSA}$  is the binding constant of the complex with DNA/BSA and  $n$  is the number of binding sites per DNA/BSA molecule and  $[Q]$  is the total concentration of the quencher. The number of binding sites ( $n$ ) and binding constant  $K_b$  have been calculated from linear fitting plots of  $\log(I_0 - I)/I$  vs  $\log [Q]$  at different temperatures (300, 310 K).

The quenching parameter can be analyzed according to the Stern-Volmer equation,<sup>11</sup>

$$I_0/I = 1 + K_{SV} [Q] \quad \dots\dots\dots(4)$$

wherein,  $I_0$  and  $I$  are the fluorescence intensities of the CT DNA in the absence and presence of complexes, respectively.  $K_{SV}$  is the Stern–Volmer dynamic quenching constant and  $[Q]$  is the total concentration of the quencher. From Stern-Volmer plot of  $I_0/I$  versus  $[Q]$ , the quenching constants ( $K_{SV}$ ) were obtained from the slop.

The bimolecular quenching constant ( $k_q$ ) was evaluated from  $k_q = K_{sv}/\tau_0$ ; wherein  $K_{SV}$  and  $\tau_0$  are Stern–Volmer quenching constant and average life time ( $\tau_0 = 10^{-8}$  s) of BSA in the absence of quencher.<sup>12</sup>

The values of  $\Delta H$  and  $\Delta S$  can be estimated from the following van't Hoff equation,

$$\ln K_T = -\frac{\Delta H}{RT} + \frac{\Delta S}{R} \quad \text{.....(5)}$$

The free energy changes ( $\Delta G$ ) at different temperatures can be calculated from the following relationship;

$$\Delta G = \Delta H - T\Delta S = -RT \ln K \quad \text{.....(6)}$$

## 2. References

- 1 R. L. Dutta and A. Syamal, Elements of Magnetochemistry second ed Affiliated East-West Press, New Delhi, 1993. p. 8.
- 2 S. U. Hossain, S. Sengupta and S. Bhattacharya, *Bioorg. Med. Chem.*, 2005, **13**, 5750.
- 3 M. E. Reichman, S. A. Rice, C. A. Thomas and P. Doty, *J. Am. Chem. Soc.*, 1954, **76**, 3047.
- 4 G. Cohen and H. Eisenberg, *Biopolymers*, 1966, **4**, 429; D. A. Scudiero, R. H. Shoemaker, K. D. Paull, A. Monks, S. Tierney, T. H. Nofziger, M. J. Currens, D. Seniff and M. R. Boyd, *Cancer Res.*, 1988, **48**, 4827.
- 6 J. H. Zhang, J. Yu, W. X. Li and C. P. Cheng, *Chin. J. Physiol.*, 1998, **41**, 121.
- 7 F. A. Tanious, J. M. Veal, H. Buczak, L. S. Ratmeyer and W. D. Wilson, *Biochemistry*, 1992, **31**, 3103.
- 8 A. Wolf, G. H. Shimer and T. Meehan, *Biochemistry*, 1987, **26**, 6392.
- 9 M. M. Saric, A. Mornar, T. B. Crnjevic and I. Jasprica, *Croatica Chem. Acta*, 2004, **1-2**, 367
- 10 E.; Gratton, N. Silva, G. Mei, N. Rosato, I. Savini and A. Finazzi-Agro, *Int. J. Quantum. Chem.*, 1992, **42**, 1479.
- 11 M. Lee, A. L. Rhodes, M. D. Wyatt, S. Forrow and J. A. Hartley, *Biochemistry*, 1993, **32**, 4237.
- 12 A. Divsalar, M. J. Bagheri, A. A. Saboury, H. Mansoori-Torshizi and M. Amani, *J. Phys. Chem. B*, 2009, **113**, 14035.

A)

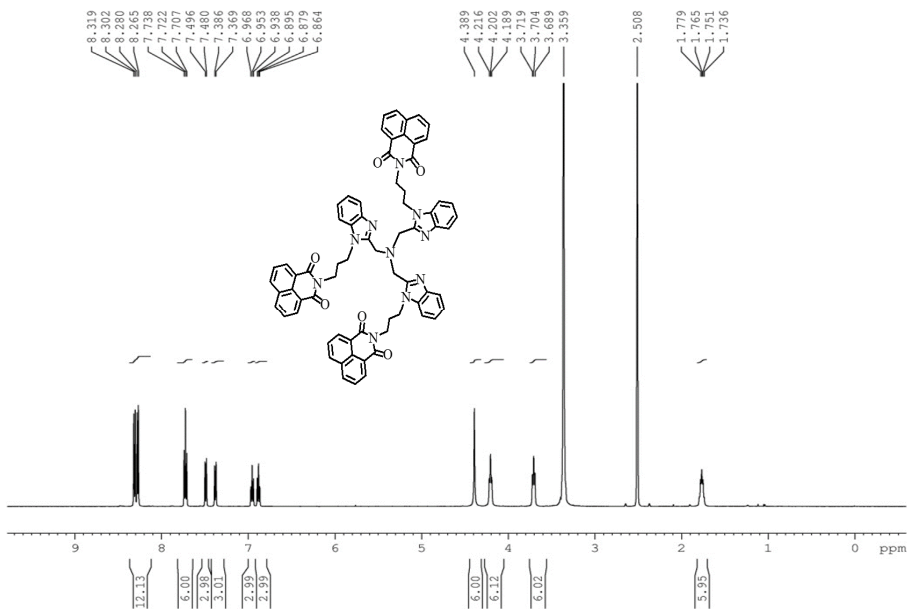

B)

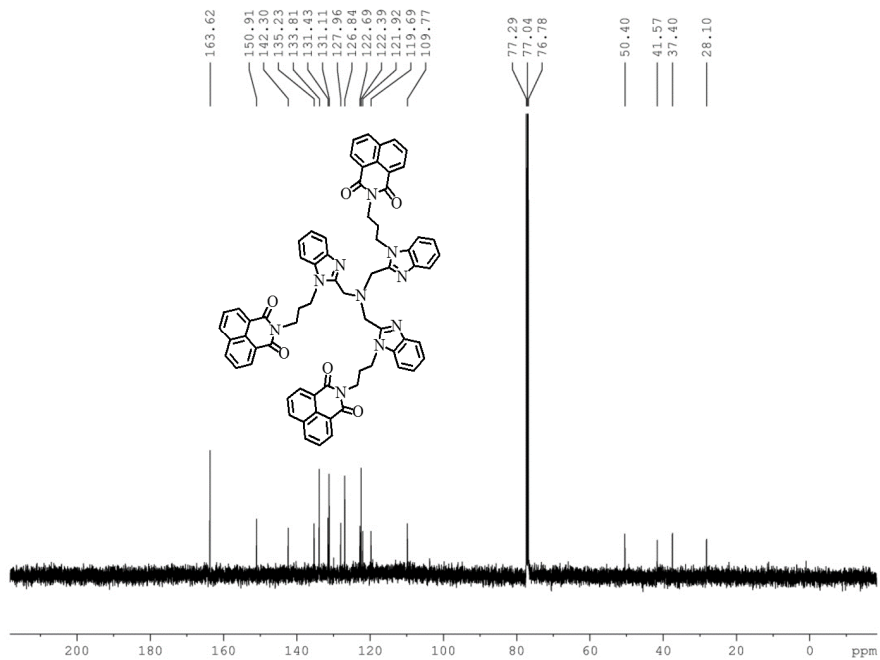



C)

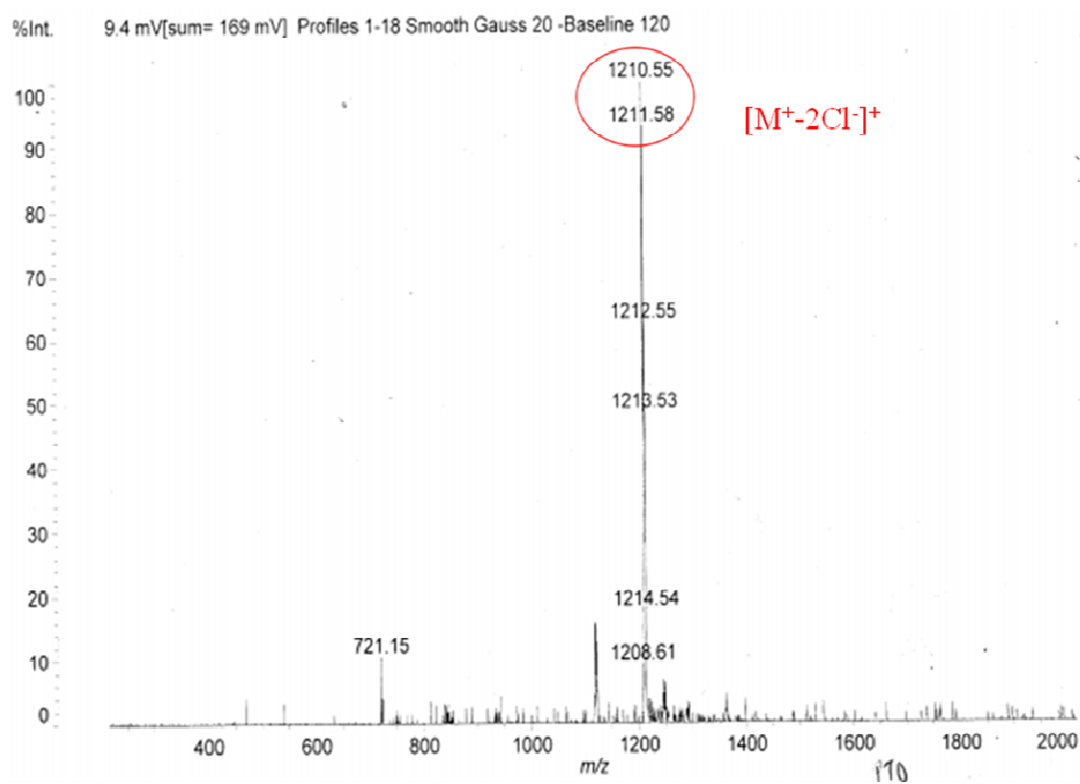

D)

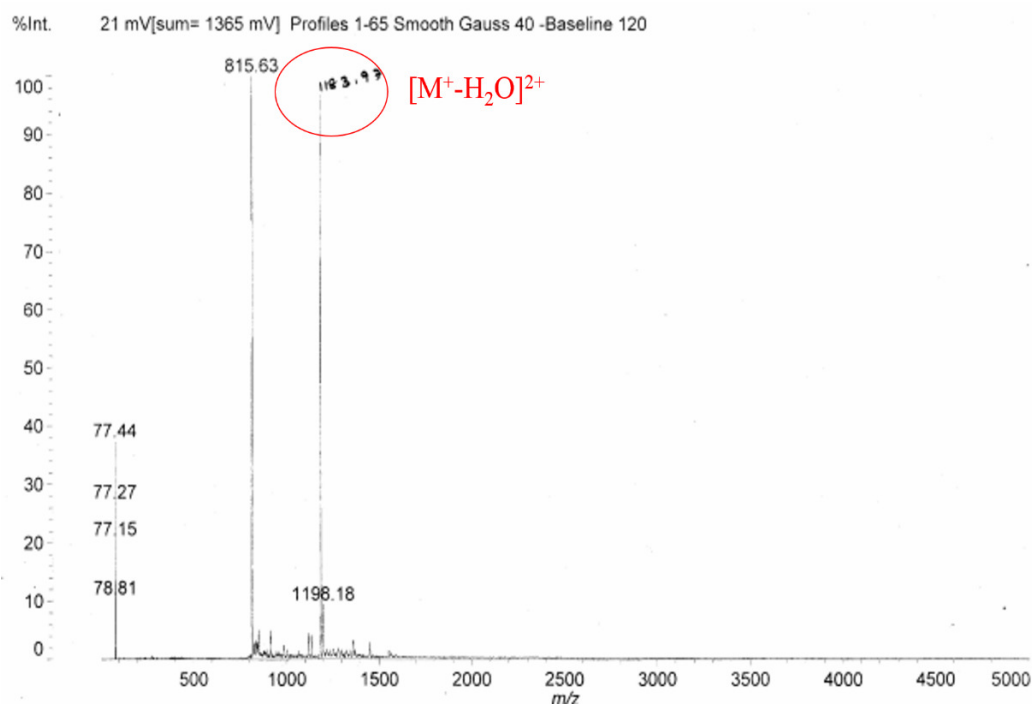

**Fig. S1** A)  $^1H$  NMR, B)  $^{13}C$  NMR spectra of **Bz-NI** and MALDI-TOF mass spectrum of the complexes C) **1**, D) **2** in DMF.

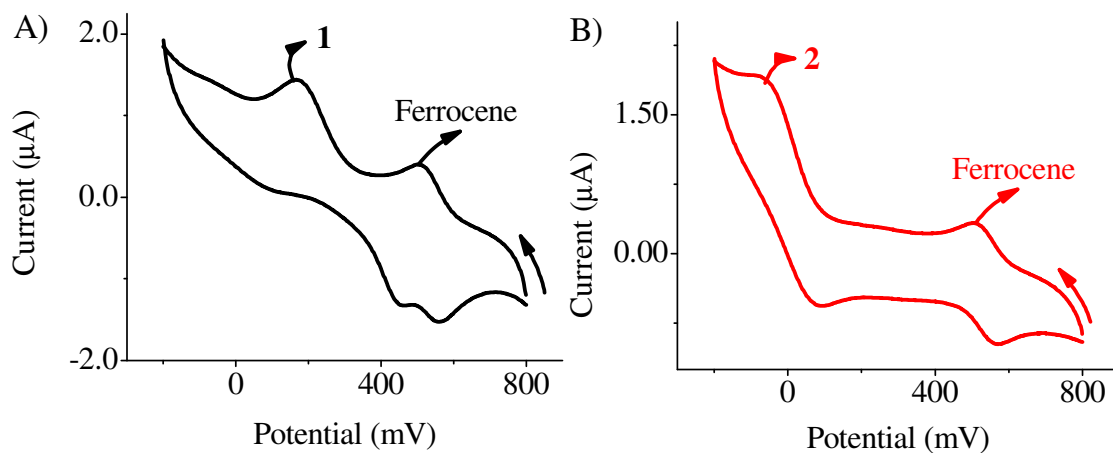

**Fig. S2** Cyclic voltammogram of the complexes **1** and **2** ( $10^{-3}\text{ M}$ ) in DMF (scan rate  $0.1\text{ V/s}$ ) in presence of ferrocene ( $1\text{ mM}$ ) as an internal standard.

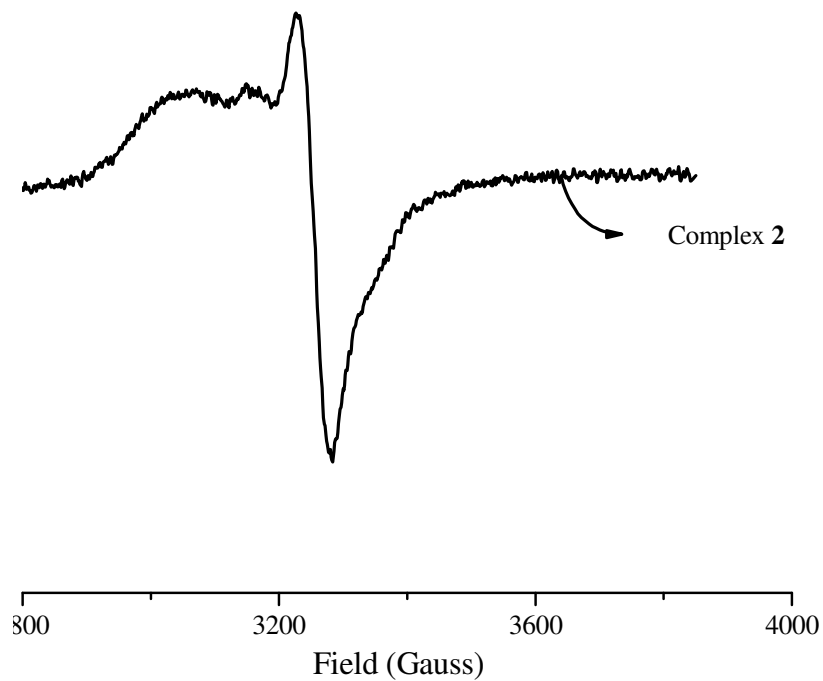

**Fig. S3** X-band EPR spectrum of complex **2** in DMF solution at room temperature.



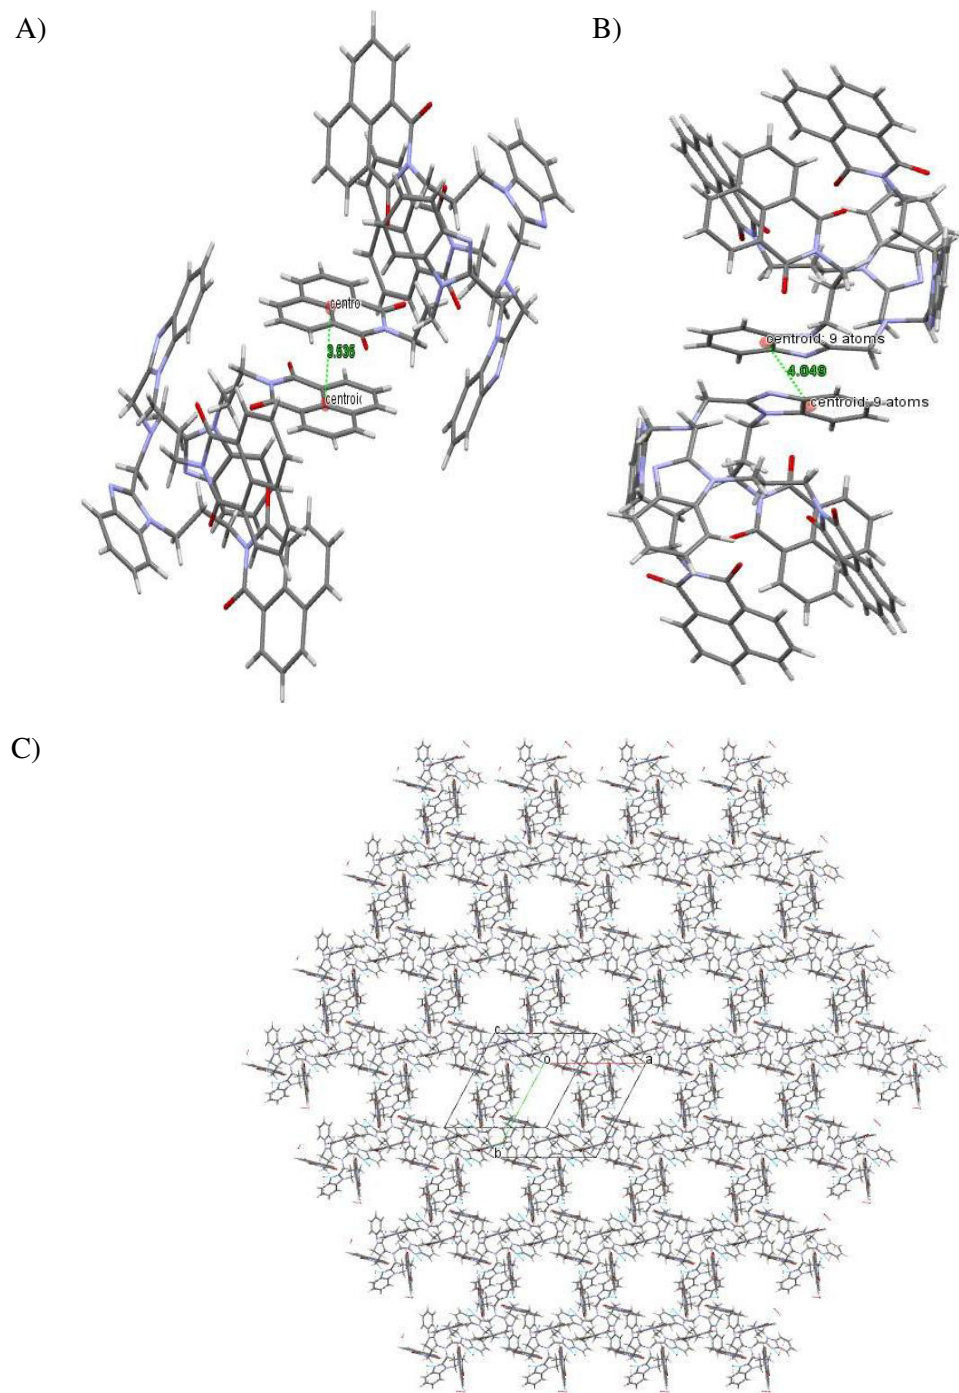

**Fig. S6** Ligand showing intermolecular  $\pi$ - $\pi$  stacking interaction between two neighbouring  
 A) Naphthalimide B) Benzimidazolyl molecules and C) 3D network.

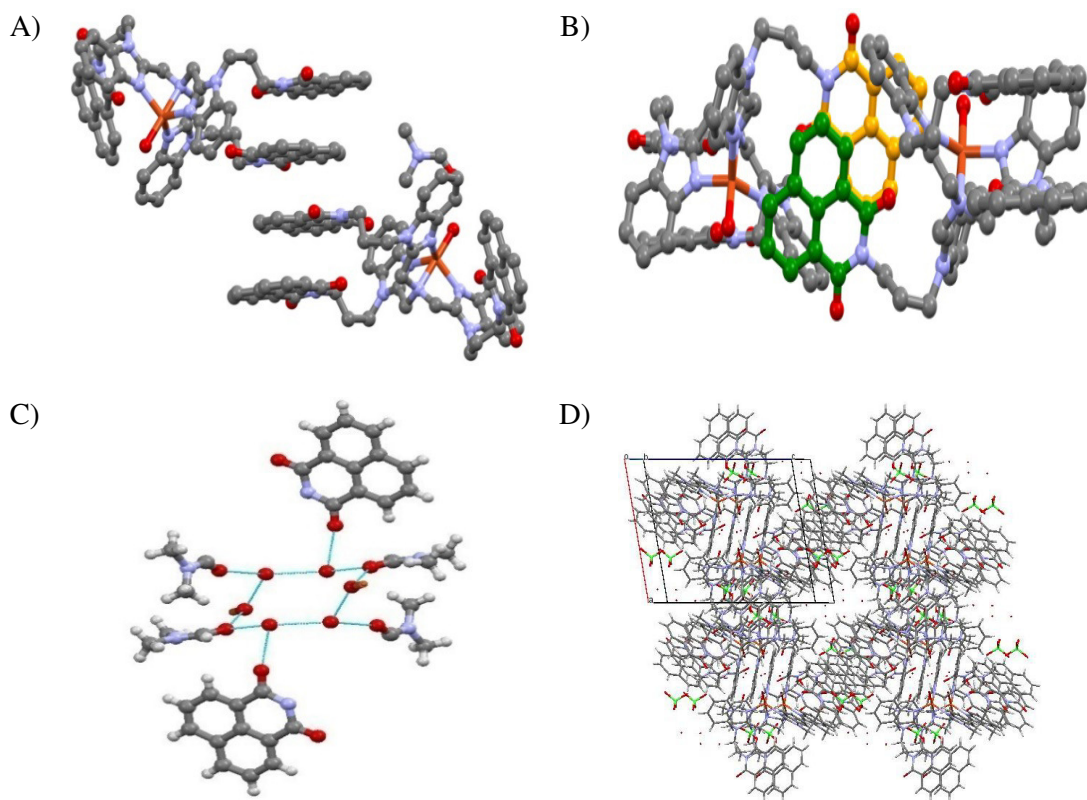

**Fig. S7** A) Face-to-face stacking, B) Edge-to-edge stacking, C) The octamer hydrogen bonded network in the crystal, D) 3D network of Cu(II) complex along the b direction.

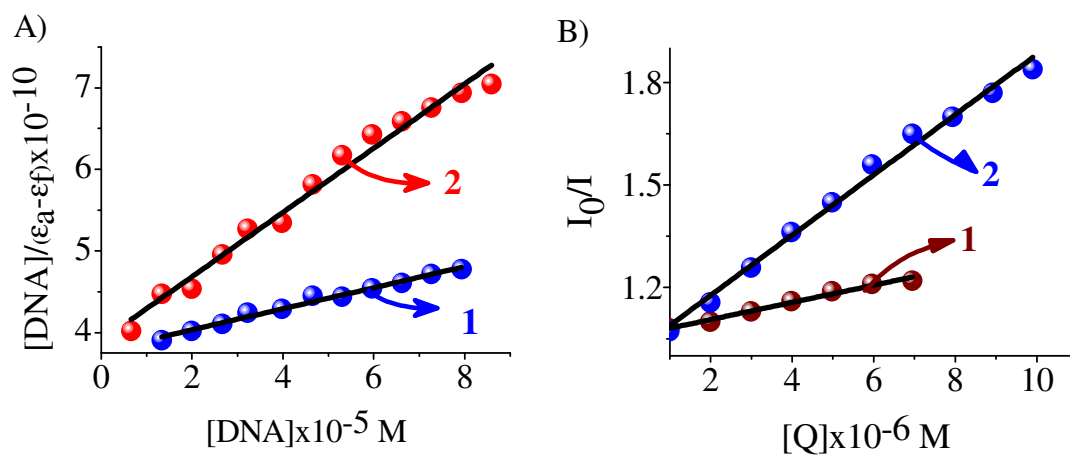

**Fig. S8** A) The plot of  $[DNA]/(\epsilon_a - \epsilon_f)$  vs  $[DNA]$  for the complexes **1** and **2**. B) The plot of  $I_0/I$  vs  $[Q]$  of the complexes **1** and **2**.

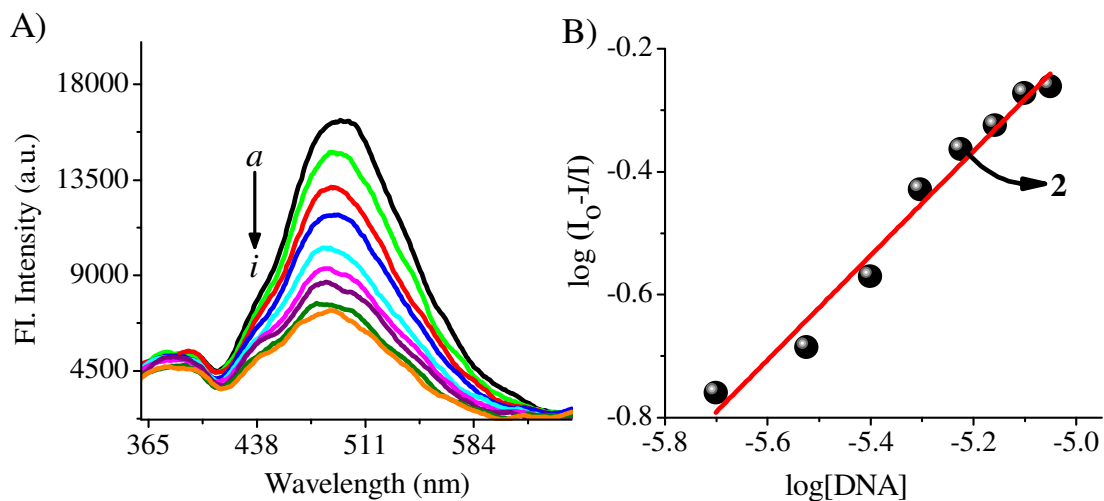

**Fig. S9** A) Fluorescence emission spectra of **2** (10  $\mu\text{M}$ ) with increasing concentration of CT-DNA. [DNA]:  $a = 0$ ;  $i = 8 \mu\text{M}$ ;  $\lambda_{\text{ex}} = 345 \text{ nm}$ , B) Double-log plots of the complex **2**.

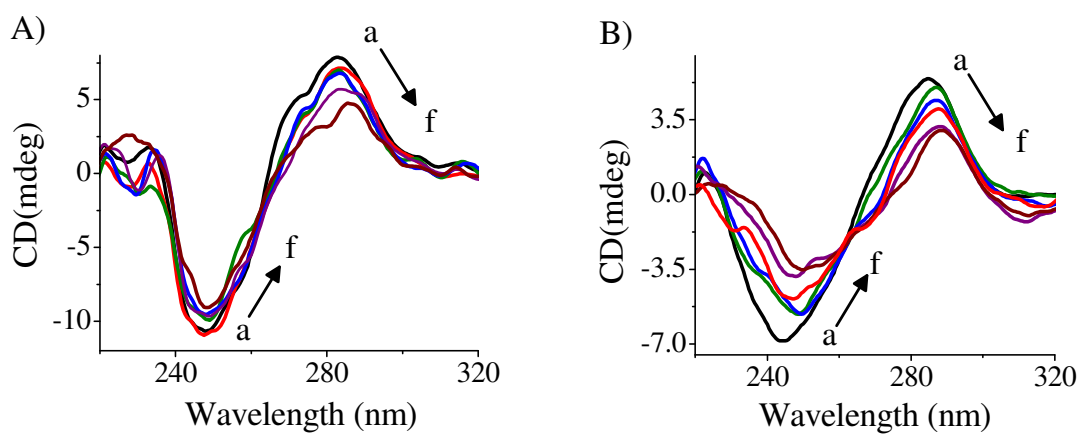

**Fig. S10** Circular dichroism spectra of DNA in the absence and presence of complexes A) **1** and B) **2** in DMF phosphate buffer (pH 7.4). [Complex]:  $a = 0$ ;  $f = 10 \mu\text{M}$ , [DNA] = 200  $\mu\text{M}$ .

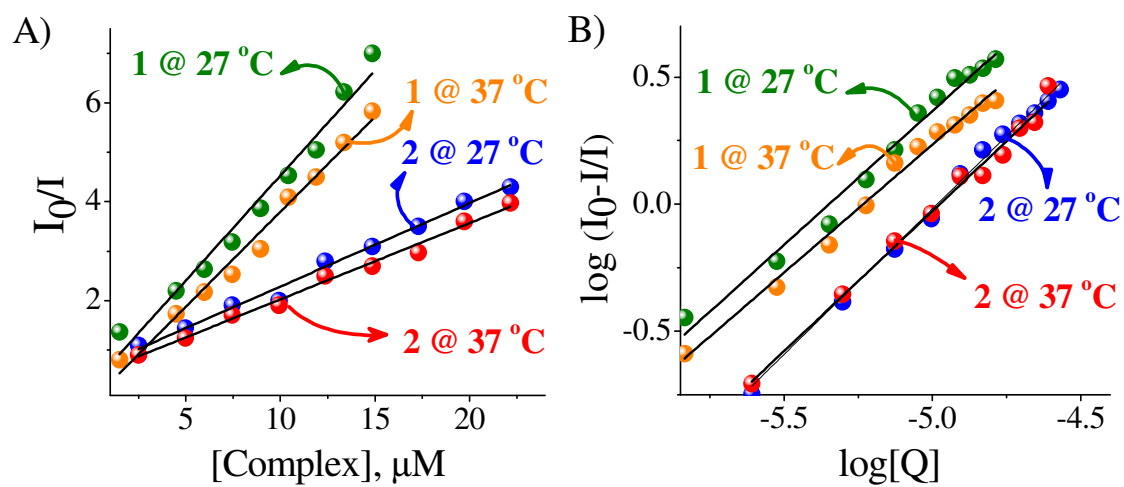

**Fig. S11** A) Stern–Volmer curves of complexes **1** and **2** with BSA at 27 °C and 37 °C. B) Double-log plots of complexes **1** and **2** with BSA at 27 °C and 37 °C.

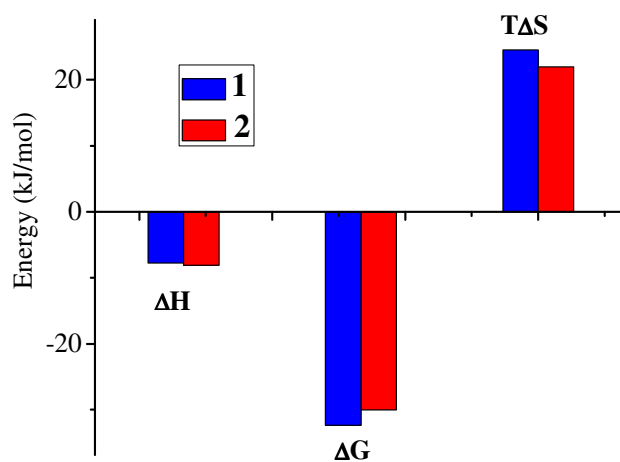

**Fig. S12** Thermodynamic parameters of the interaction of BSA with **1** and **2**.

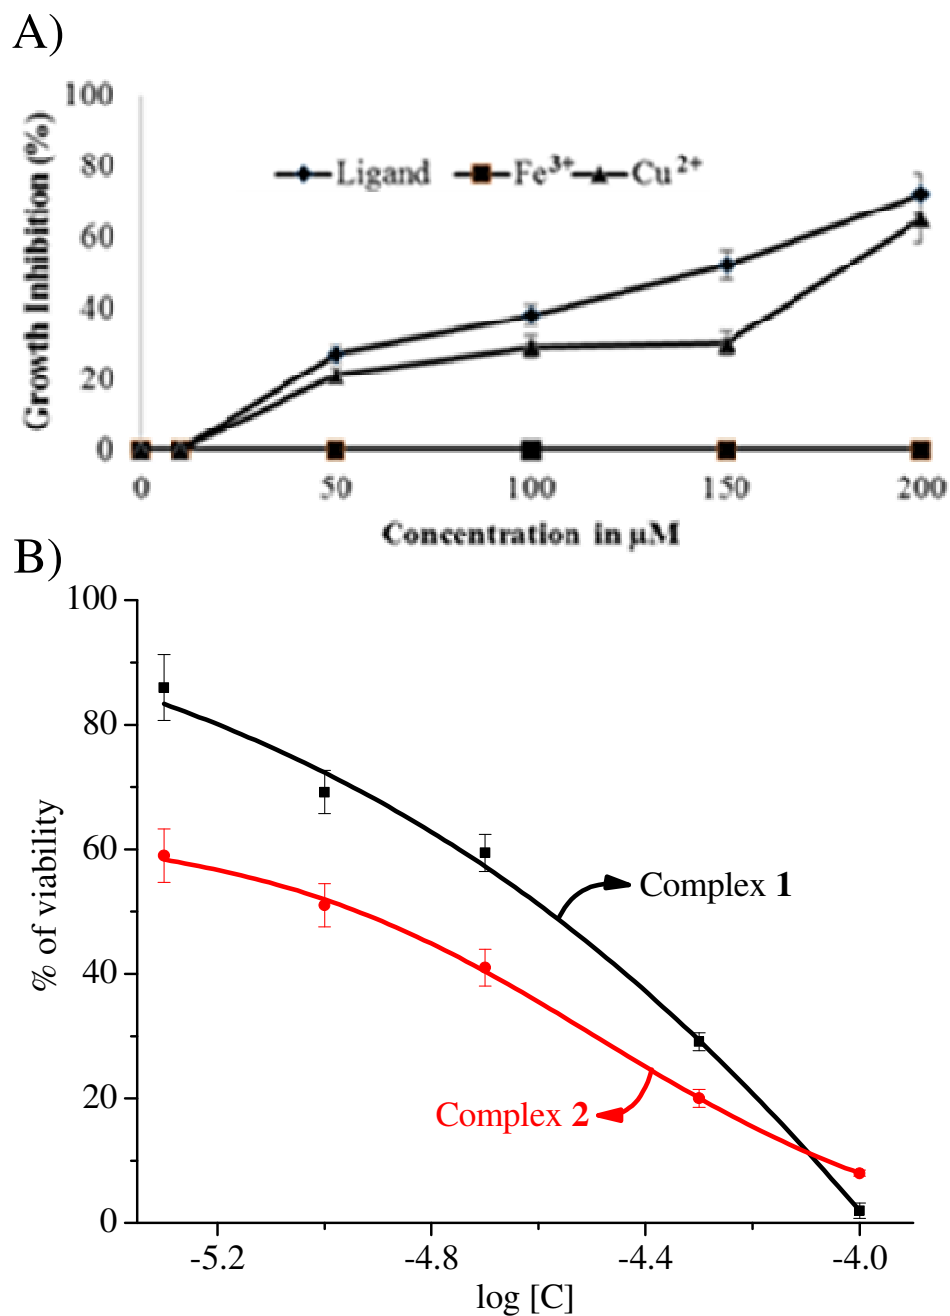

**Fig. S13** A) *In vitro* cytotoxicity assay with different concentrations of the ligand (**Bz-NI**) and metal salts (0-200  $\mu$ M) against the HeLa cell line. (Data are mean%  $\pm$  SD of triplicate); B) Sigmoid fitted curves for the complexes **1** and **2** obtained by plotting cell viability against log[C] through ORIGIN 8.5 software.



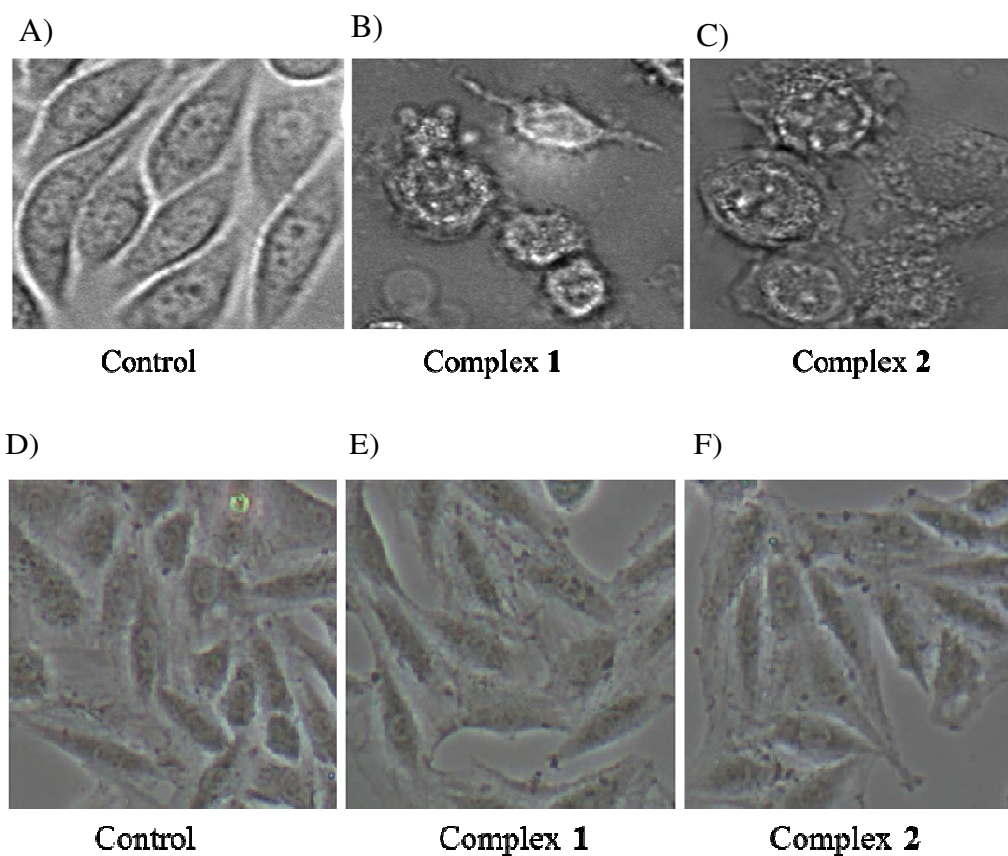

**Fig. S14** Phase contrast images of A, D) control (*HeLa*) and (*H9C2*) cells; B-C, E-F) after treatment of the complexes **1** and **2** with *HeLa* and *H9C2* cell lines, respectively.

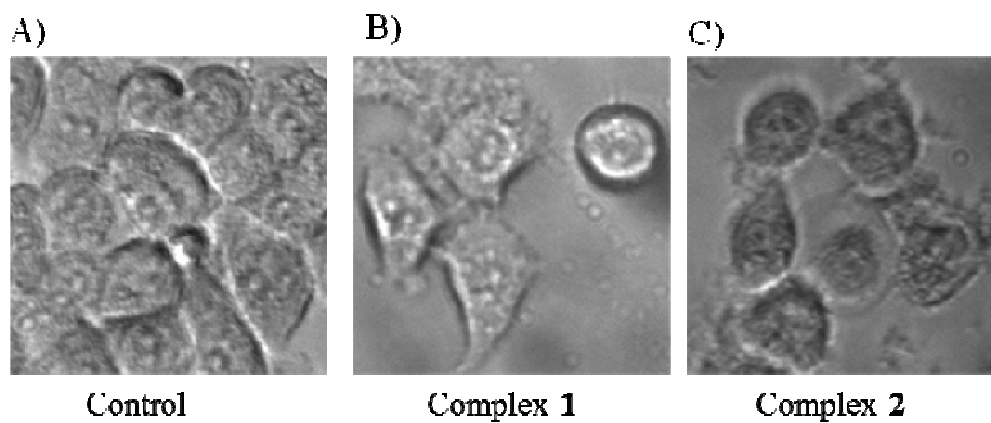

**Fig. S15** Bright-field images of A) control (*HeLa*) cells B,C) complexes **1** and **2** respectively, after staining with DAPI.

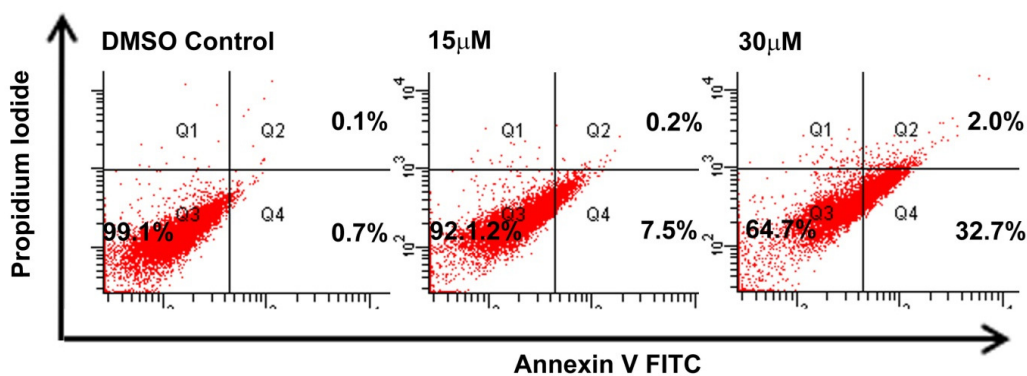

**Fig. S16** Flow cytometric analysis of *HeLa* cells treated with different concentrations of the complex **1** for 24 h. The lower left quadrant of each panel shows viable cells, negative for Annexin V-FITC/PI. The lower right quadrants represent the apoptotic cells (annexin V-FITC+/PI-), while the upper right quadrants represent the necrotic or late-stage apoptotic cells (annexin V-FITC+/PI+).

**Table S1.** Cyclic voltammetric measurements<sup>a</sup>

| Complexes | E <sub>pa</sub> /mV | E <sub>pc</sub> /mV | E <sub>1/2</sub> <sup>b</sup> , mV (ΔE <sub>p</sub> <sup>c</sup> , mV) | <sup>d</sup> n=i <sub>pa</sub> /i <sub>pc</sub> |
|-----------|---------------------|---------------------|------------------------------------------------------------------------|-------------------------------------------------|
| <b>1</b>  | 450                 | 172                 | 311 (278)                                                              | 0.9                                             |
| <b>2</b>  | 95                  | -73                 | 11 (168)                                                               | 0.3                                             |

<sup>a</sup>Measured in DMF for **1**, **2** with 0.1 M tetrabutyl ammonium hexafluorophosphate. <sup>b</sup>E<sub>1/2</sub> is calculated as average of anodic (E<sub>pa</sub>) and cathodic (E<sub>pc</sub>) peak potentials E<sub>1/2</sub> = 1/2(E<sub>pa</sub>+E<sub>pc</sub>); and <sup>c</sup>ΔE<sub>p</sub> = E<sub>pa</sub>-E<sub>pc</sub> at scan rate 0.1 V/s. <sup>d</sup>Constant-potential coulometric data n = i<sub>pa</sub>/i<sub>pc</sub> calculated for 1e<sup>-</sup> transfer.

**Table S2.** Crystal data and structure refinement details for **Bz-Ni**·3H<sub>2</sub>O and **2**·2DMF·4H<sub>2</sub>O

|                                                           | <b>Bz-Ni</b> ·3H <sub>2</sub> O | <b>2</b> ·2DMF·4H <sub>2</sub> O |
|-----------------------------------------------------------|---------------------------------|----------------------------------|
| <b>Formula weight (gmol<sup>-1</sup>)</b>                 | 1171.25                         | 1615.91                          |
| <b>Crystal system</b>                                     | Triclinic                       | Triclinic                        |
| <b>Space group</b>                                        | <i>P</i> $\bar{1}$              | <i>P</i> $\bar{1}$               |
| <b><i>a</i> (Å)</b>                                       | 15.68(2)                        | 15.244(8)                        |
| <b><i>b</i> (Å)</b>                                       | 16.44(2)                        | 15.370(9)                        |
| <b><i>c</i> (Å)</b>                                       | 17.69(2)                        | 17.480(9)                        |
| <b><math>\alpha</math> (°)</b>                            | 91.408(12)                      | 82.582(8)                        |
| <b><math>\gamma</math> (°)</b>                            | 115.658(13)                     | 80.483(19)                       |
| <b><math>\beta</math> (°)</b>                             | 117.999(12)                     | 88.567(19)                       |
| <b><i>V</i> (Å<sup>3</sup>)</b>                           | 3477(9)                         | 4005(4)                          |
| <b><i>Z</i></b>                                           | 2                               | 2                                |
| <b>Temperature /K</b>                                     | 298(2)                          | 123(2)                           |
| <b><math>\lambda</math> (Å) (Mo-<i>K</i><sub>α</sub>)</b> | 0.71073                         | 0.71073                          |
| <b>Crystal size (mm)</b>                                  | 0.20x0.20x0.10                  | 0.25x0.20x0.15                   |
| <b><i>F</i>(000)</b>                                      | 1228                            | 1682                             |
| <b>Theta range for data collection</b>                    | 2.998-26.250                    | 3.001-26.247                     |
| <b>Data/restraints/parameters</b>                         | 13667/0/799                     | 15656/0/ 1025                    |
| <b>GOF on F<sup>2</sup></b>                               | 0.707                           | 1.024                            |
| <b><i>R</i><sub>1</sub> [<i>I</i> &gt; 2σ(<i>I</i>)]</b>  | 0.0886                          | 0.0941                           |
| <b>w<i>R</i><sub>2</sub> [<i>I</i> &gt; 2σ(<i>I</i>)]</b> | 0.2216                          | 0.2206                           |

**Table S3.** Selected bond lengths (Å) and bond angles (deg) for **Bz-NI**·3H<sub>2</sub>O and **2**·2DMF·4H<sub>2</sub>O

| S.No.                            | Bond Lengths (Å) |          | Bond Angles (deg) |            |
|----------------------------------|------------------|----------|-------------------|------------|
| <b>Bz-NI</b> ·3H <sub>2</sub> O  | N22-C22          | 1.322(7) | C32-C31-N1        | 111.9(4)   |
|                                  | N32-C32          | 1.334(7) | C12-C11-N1        | 110.9(4)   |
|                                  | N12-C12          | 1.320(6) | C22-C21-N1        | 111.6(4)   |
|                                  | N1-C11           | 1.482(7) |                   |            |
| <b>2</b> ·2DMF·4H <sub>2</sub> O | Cu1-N2           | 2.076(4) | O6-Cu1-N4         | 98.32(16)  |
|                                  | Cu1-N5           | 2.093(5) | O6-Cu1-N2         | 178.73(18) |
|                                  | Cu1-N4           | 2.028(4) | O6-Cu1-N3         | 100.02(16) |
|                                  | Cu1-N3           | 2.109(5) | O6-Cu1-N5         | 101.33(18) |
|                                  | Cu1-O6           | 1.950(4) | N2-Cu1-N5         | 79.82(18)  |
|                                  |                  |          | N2-Cu1-N3         | 80.06(16)  |
|                                  |                  |          | N2-Cu1-N4         | 80.59(17)  |
|                                  |                  |          | N5-Cu1-N3         | 109.11(17) |
|                                  |                  |          | N4-Cu1-N3         | 121.91(18) |
|                                  |                  |          | N4-Cu1-N5         | 120.35(17) |
|                                  |                  |          |                   |            |
|                                  |                  |          |                   |            |

**Table S4.** Binding and relative thermodynamic parameters of BSA with complexes **1** and **2**

| S.No.    | Temp (K) | Binding constant $K_b \times 10^5$ (M <sup>-1</sup> ) | Number of binding site (n) | $\Delta H$ (kJ/mol) | $\Delta S$ (J/molK) | $\Delta G$ (kJ/mol) | R     |
|----------|----------|-------------------------------------------------------|----------------------------|---------------------|---------------------|---------------------|-------|
| <b>1</b> | 300      | 4.1                                                   | 1.05                       | -7.80               | 81.72               | -32.31              | 0.981 |
|          | 310      | 1.8                                                   | 1.01                       |                     |                     | -33.13              | 0.988 |
| <b>2</b> | 300      | 5.0                                                   | 1.14                       | -8.11               | 73.09               | -30.03              | 0.995 |
|          | 310      | 2.9                                                   | 1.10                       |                     |                     | -30.76              | 0.989 |

<sup>a</sup>R is the linear correlated coefficient**Table S5.** Experimentally measured and computed ligand log P values by ALOGSP 2.1 program.

| Compound     | Experimentally measured log P | Calculated ligand log P |
|--------------|-------------------------------|-------------------------|
| <b>Bz-NI</b> | 1.45                          | 2.54                    |
| <b>1</b>     | 0.92                          | -                       |
| <b>2</b>     | 1.55                          | -                       |
